# Supplementary material for: Lunasin attenuates obesity-related inflammation in RAW264.7 cells and 3T3-L1 adipocytes by inhibiting inflammatory cytokine production
Source: PubMed Central journal article supplement (PMC5300240; doi:10.1371/journal.pone.0171969), 2017-02-09
Supplement: pone.0171969.s001.pdf [file pone.0171969.s001.pdf]

## Figure 1. Experimental design and basal conditions

### B. lunasin\_cell viability

| lunasin(uM) | test 1 |            | test 2 |            | test 3 |            |                    |      |   |     | LSD_p value |
|-------------|--------|------------|--------|------------|--------|------------|--------------------|------|---|-----|-------------|
|             | OD     | viability% | OD     | viability% | OD     | viability% | mean of viability% | SD   | n | SEM | viability%  |
| control     | 0.655  | 100.0      | 0.628  | 100.0      | 0.677  | 100.0      | 100.0              | 0.0  | 3 | 0.0 |             |
| 0.2         | 0.632  | 107.8      | 0.658  | 99.7       | 0.743  | 98.0       | 101.9              | 5.2  | 3 | 3.0 | 0.780       |
| 1           | 0.63   | 100.0      | 0.761  | 100.0      | 0.711  | 100.0      | 100.0              | 0.0  | 3 | 0.0 | 1.000       |
| 10          | 0.693  | 90.9       | 0.764  | 99.6       | 0.666  | 106.8      | 99.1               | 7.9  | 3 | 4.6 | 0.891       |
| 50          | 0.747  | 91.2       | 0.762  | 86.1       | 0.653  | 111.6      | 96.3               | 13.5 | 3 | 7.8 | 0.575       |
| 200         | 0.739  | 94.5       | 0.725  | 82.2       | 0.419  | 101.7      | 92.8               | 9.8  | 3 | 5.7 | 0.284       |

### C. LPS\_cell viability

| LPS dose(ng/ml) | test 1 |        |            | test 2 |        |            | test 3 |        |            |                    |      |   |      |             |
|-----------------|--------|--------|------------|--------|--------|------------|--------|--------|------------|--------------------|------|---|------|-------------|
|                 | mean   | -blank | viability% | mean   | -blank | viability% | Mean   | -blank | viability% | mean of viability% | SD   | n | SEM  | LSD_p value |
| blank           | 0.055  |        |            | 0.053  |        |            | 0.05   |        |            |                    |      |   |      |             |
| 0               | 2.939  | 2.884  | 100.0      | 0.847  | 0.794  | 100.0      | 2.387  | 2.337  | 100.0      | 100.0              | 0.0  | 3 | 0.0  |             |
| 10              | 3.373  | 3.318  | 115.1      | 1.025  | 0.972  | 122.5      | 2.762  | 2.712  | 116.0      | 117.9              | 4.0  | 3 | 2.3  | 0.157       |
| 25              | 3.322  | 3.267  | 113.3      | 1.132  | 1.079  | 135.9      | 2.744  | 2.694  | 115.3      | 121.5              | 12.5 | 3 | 7.2  | 0.093       |
| 50              | 3.185  | 3.130  | 108.5      | 1.146  | 1.093  | 137.7      | 2.884  | 2.834  | 121.3      | 122.5              | 14.6 | 3 | 8.4  | 0.080       |
| 100             | 3.232  | 3.177  | 110.2      | 1.205  | 1.152  | 145.1      | 2.707  | 2.657  | 113.7      | 123.0              | 19.3 | 3 | 11.1 | 0.074       |
| 250             | 2.938  | 2.883  | 100.0      | 1.095  | 1.042  | 131.3      | 2.786  | 2.736  | 117.1      | 116.1              | 15.7 | 3 | 9.1  | 0.199       |
| 500             | 2.654  | 2.599  | 90.1       | 1.047  | 0.994  | 125.2      | 2.604  | 2.554  | 109.3      | 108.2              | 17.5 | 3 | 10.1 | 0.506       |
| 1000            | 2.723  | 2.668  | 92.5       | 1.074  | 1.021  | 128.6      | 2.222  | 2.172  | 92.9       | 104.7              | 20.7 | 3 | 12.0 | 0.704       |

D. LPS\_MCP-1

| LPS (ng/mL) | pg/ml  |        | % of control |         |         |        |   |        |             |
|-------------|--------|--------|--------------|---------|---------|--------|---|--------|-------------|
|             | 1      | 2      | 1            | 2       | mean    | SD     | n | SEM    | LSD_p value |
| 0           | 23.4   | 7.3    | 100.0        | 100.0   | 100     | 0      | 2 | 0      |             |
| 10          | 497.4  | 114.6  | 2122.2       | 1559.0  | 1840.6  | 398.2  | 2 | 281.6  | 0.062       |
| 25          | 596.4  | 251.9  | 2544.4       | 3427.9  | 2986.2  | 624.7  | 2 | 441.7  | 0.007       |
| 50          | 1023.4 | 384.5  | 4366.7       | 5231.1  | 4798.9  | 611.3  | 2 | 432.2  | 0.000       |
| 100         | 2200.5 | 684.5  | 9388.9       | 9313.1  | 9351.0  | 53.6   | 2 | 37.9   | 0.000       |
| 250         | 3257.8 | 990.5  | 13900.0      | 13477.0 | 13688.5 | 299.1  | 2 | 211.5  | 0.000       |
| 500         | 3862.0 | 1001.3 | 16477.8      | 13624.6 | 15051.2 | 2017.5 | 2 | 1426.6 | 0.000       |
| 1000        | 3502.6 | 1070.0 | 14944.4      | 14559.0 | 14751.7 | 272.5  | 2 | 192.7  | 0.000       |

**Figure 2. Lunasin inhibited inflammatory cytokine production in leptin-conditioned RAW264.7 cells**

A. leptin dose\_cell viability

| leptin              |        |        |            |        |        |            |        |        |            |                    |      |   |     |             |
|---------------------|--------|--------|------------|--------|--------|------------|--------|--------|------------|--------------------|------|---|-----|-------------|
| leptin dose (ng/mL) | test 1 |        |            | test 2 |        |            | test 3 |        |            | viability%         |      |   |     |             |
|                     | Mean   | -blank | viability% | mean   | -blank | viability% | mean   | -blank | viability% | mean of viability% | SD   | n | SEM | LSD_p value |
| blank               | 0.055  |        |            | 0.054  |        |            | 0.05   |        |            |                    |      |   |     |             |
| 0                   | 1.725  | 1.670  | 100.0      | 0.728  | 0.674  | 100.0      | 1.992  | 1.942  | 100.0      | 100.0              | 0.0  | 3 | 0.0 |             |
| 50                  | 2.099  | 2.044  | 121.7      | 0.878  | 0.824  | 122.3      | 1.910  | 1.860  | 95.8       | 113.3              | 15.2 | 3 | 8.7 | 0.171       |
| 100                 | 1.976  | 1.921  | 114.6      | 0.817  | 0.763  | 113.3      | 2.021  | 1.971  | 101.5      | 109.8              | 7.2  | 3 | 4.2 | 0.304       |
| 200                 | 2.113  | 2.058  | 122.5      | 0.912  | 0.858  | 127.3      | 1.997  | 1.947  | 100.2      | 116.7              | 14.5 | 3 | 8.3 | 0.091       |
| 400                 | 2.116  | 2.061  | 122.7      | 0.860  | 0.806  | 119.6      | 2.045  | 1.995  | 102.7      | 115.0              | 10.7 | 3 | 6.2 | 0.125       |
| 800                 | 2.109  | 2.054  | 122.3      | 0.902  | 0.848  | 125.8      | 2.067  | 2.017  | 103.9      | 117.3              | 11.8 | 3 | 6.8 | 0.080       |
| 1600                | 2.093  | 2.038  | 121.4      | 0.901  | 0.847  | 125.7      | 2.056  | 2.006  | 103.3      | 116.8              | 11.9 | 3 | 6.9 | 0.089       |

| leptin+LPS          |        |        |            |        |        |            |        |        |            |                    |      |   |     |             |
|---------------------|--------|--------|------------|--------|--------|------------|--------|--------|------------|--------------------|------|---|-----|-------------|
| leptin dose (ng/mL) | test 1 |        |            | test 2 |        |            | test 3 |        |            | viability%         |      |   |     |             |
|                     | Mean   | -blank | viability% | mean   | -blank | viability% | mean   | -blank | viability% | mean of viability% | SD   | n | SEM | LSD_p value |
| blank               | 0.055  |        |            | 0.054  |        |            | 0.05   |        |            |                    |      |   |     |             |
| 0                   | 2.463  | 2.408  | 100.0      | 0.858  | 0.804  | 100.0      | 2.334  | 2.284  | 100.0      | 100.0              | 0.0  | 3 | 0.0 |             |
| 50                  | 2.775  | 2.720  | 112.7      | 1.015  | 0.961  | 119.5      | 2.457  | 2.407  | 105.4      | 112.5              | 7.0  | 3 | 4.1 | 0.125       |
| 100                 | 2.525  | 2.470  | 102.5      | 1.066  | 1.012  | 125.8      | 2.548  | 2.498  | 109.4      | 112.6              | 12.0 | 3 | 6.9 | 0.124       |
| 200                 | 2.536  | 2.481  | 103.0      | 1.042  | 0.988  | 122.9      | 2.636  | 2.586  | 113.2      | 113.0              | 10.0 | 3 | 5.8 | 0.112       |
| 400                 | 2.739  | 2.684  | 111.2      | 1.066  | 1.012  | 125.8      | 2.499  | 2.449  | 107.2      | 114.8              | 9.8  | 3 | 5.7 | 0.076       |
| 800                 | 2.283  | 2.228  | 92.7       | 1.005  | 0.951  | 118.3      | 2.527  | 2.477  | 108.5      | 106.5              | 12.9 | 3 | 7.4 | 0.412       |
| 1600                | 2.692  | 2.637  | 109.3      | 1.020  | 0.966  | 120.2      | 2.438  | 2.388  | 104.5      | 111.4              | 8.0  | 3 | 4.6 | 0.162       |

#### B. leptin dose\_MCP-1

| leptin              |       |      |     |     |      |     |   |     |              |     |       |       |      |   |      |             |
|---------------------|-------|------|-----|-----|------|-----|---|-----|--------------|-----|-------|-------|------|---|------|-------------|
| leptin dose (ng/mL) | pg/ml |      |     |     |      |     |   |     | % of control |     |       |       |      |   |      |             |
| test                | 1     | 2    | 3   | 4   | mean | SD  | n | SEM | 1            | 2   | 3     | mean  | SD   | n | SEM  | LSD_p value |
| 0                   | 13.8  | 14.0 | 2.2 | 0.7 | 7.7  | 7.2 | 4 | 3.6 | 100          | 100 | 100.0 | 100.0 | 0.0  | 3 | 0.0  |             |
| 50                  | 12.3  | 10.9 | 2.7 | 0.7 | 6.6  | 5.8 | 4 | 2.9 | 89           | 122 | 102.2 | 104.3 | 16.2 | 3 | 9.4  | 0.850       |
| 100                 | 13.3  | 14.4 | 3.4 | 0.8 | 8.0  | 6.9 | 4 | 3.5 | 96           | 152 | 117.4 | 121.9 | 27.9 | 3 | 16.1 | 0.350       |
| 200                 | 12.3  | 12.4 | 3.7 | 0.8 | 7.3  | 5.9 | 4 | 3.0 | 89           | 169 | 123.9 | 127.4 | 39.9 | 3 | 23.1 | 0.245       |
| 400                 | 14.0  | 9.0  | 3.6 | 0.9 | 6.9  | 5.8 | 4 | 2.9 | 101          | 165 | 134.8 | 133.5 | 31.8 | 3 | 18.3 | 0.159       |
| 800                 | 15.6  | 12.7 | 3.4 | 1.0 | 8.2  | 7.1 | 4 | 3.5 | 113          | 156 | 152.2 | 140.4 | 23.8 | 3 | 13.7 | 0.095       |
| 1600                | 15.1  | 11.0 | 3.8 | 1.1 | 7.7  | 6.4 | 4 | 3.2 | 110          | 173 | 160.9 | 147.9 | 33.8 | 3 | 19.5 | 0.052       |

  

| leptin+LPS          |        |      |      |      |       |       |   |       |              |       |       |       |     |   |     |             |
|---------------------|--------|------|------|------|-------|-------|---|-------|--------------|-------|-------|-------|-----|---|-----|-------------|
| leptin dose (ng/mL) | pg/ml  |      |      |      |       |       |   |       | % of control |       |       |       |     |   |     |             |
| test                | 1      | 2    | 3    | 4    | mean  | SD    | n | SEM   | 1            | 2     | 3     | mean  | SD  | n | SEM | LSD_p value |
| 0                   | 1059.7 | 41.2 | 17.0 | 80.3 | 299.5 | 507.4 | 4 | 253.7 | 100.0        | 100.0 | 100.0 | 100.0 | 0.0 | 3 | 0.0 |             |

|      |        |      |      |       |       |        |   |       |       |       |       |       |      |   |      |       |
|------|--------|------|------|-------|-------|--------|---|-------|-------|-------|-------|-------|------|---|------|-------|
| 50   | 1636.7 | 69.6 | 20.1 | 105.1 | 457.9 | 786.7  | 4 | 393.3 | 168.9 | 118.5 | 130.9 | 139.4 | 26.3 | 3 | 15.2 | 0.136 |
| 100  | 1682.6 | 76.8 | 17.7 | 103.8 | 470.2 | 809.1  | 4 | 404.5 | 186.5 | 104.5 | 129.2 | 140.1 | 42.1 | 3 | 24.3 | 0.130 |
| 200  | 1944.9 | 82.5 | 22.8 | 105.7 | 539.0 | 938.0  | 4 | 469.0 | 200.4 | 134.2 | 131.6 | 155.4 | 39.0 | 3 | 22.5 | 0.043 |
| 400  | 2066.2 | 76.4 | 19.5 | 120.3 | 570.6 | 997.9  | 4 | 499.0 | 185.6 | 115.2 | 149.8 | 150.2 | 35.2 | 3 | 20.3 | 0.064 |
| 800  | 1312.1 | 76.0 | 21.7 | 108.8 | 379.7 | 622.7  | 4 | 311.3 | 184.6 | 128.1 | 135.6 | 149.4 | 30.7 | 3 | 17.7 | 0.067 |
| 1600 | 2263.0 | 43.7 | 24.3 | 95.7  | 606.6 | 1104.6 | 4 | 552.3 | 106.0 | 143.2 | 119.1 | 122.8 | 18.9 | 3 | 10.9 | 0.376 |

### C. leptin\_MCP-1

| MCP-1 (pg/mL) lunasin(uM) |    | pg/ml  |        |        |        |        |        |   |       | % of control |        |        |        |       |      |   |      |             |
|---------------------------|----|--------|--------|--------|--------|--------|--------|---|-------|--------------|--------|--------|--------|-------|------|---|------|-------------|
|                           |    | test 1 | test 2 | test 3 | test 4 | mean   | SD     | n | SEM   | test 1       | test 2 | test 3 | test 4 | mean  | SD   | n | SEM  | LSD_p value |
| leptin 200ng/ml           | 0  | 36.3   | 19.6   | 11.6   | 22.9   | 22.6   | 10.3   | 4 | 5.1   | 100.0        | 100.0  | 100.0  | 100.0  | 100.0 | 0.0  | 4 | 0.0  |             |
|                           | 1  | 28.0   | 19.1   | 13.0   |        | 20.1   | 7.5    | 3 | 4.4   | 77.2         | 97.6   | 112.1  |        | 95.6  | 17.5 | 3 | 10.1 | 0.835       |
|                           | 10 | 26.5   | 16.0   | 13.0   | 32.7   | 22.1   | 9.2    | 4 | 4.6   | 72.9         | 81.7   | 112.1  | 143.0  | 102.4 | 31.9 | 4 | 15.9 | 0.901       |
|                           | 50 | 36.3   | 15.5   | 13.3   | 36.6   | 25.5   | 12.8   | 4 | 6.4   | 100.0        | 79.3   | 114.8  | 160.1  | 113.5 | 34.3 | 4 | 17.1 | 0.489       |
| LPS 100ng/ml              | 0  | 3130.7 | 4608.0 | 5835.2 | 5676.1 | 4812.5 | 1246.6 | 4 | 623.3 | 100.0        | 100.0  | 100.0  | 100.0  | 100.0 | 0.0  | 4 | 0.0  |             |
|                           | 1  | 2448.9 | 4914.8 | 4943.2 | 4323.9 | 4157.7 | 1174.4 | 4 | 587.2 | 78.2         | 106.7  | 84.7   | 76.2   | 86.4  | 14.0 | 4 | 7.0  | 0.039       |
|                           | 10 | 2039.8 | 3215.9 | 4233.0 | 3664.8 | 3288.4 | 930.6  | 4 | 465.3 | 65.2         | 69.8   | 72.5   | 64.6   | 68.0  | 3.8  | 4 | 1.9  | 0.000       |
|                           | 50 | 1840.9 | 2068.2 | 3460.2 | 2818.2 | 2546.9 | 738.3  | 4 | 369.2 | 58.8         | 44.9   | 59.3   | 49.6   | 53.2  | 7.1  | 4 | 3.5  | 0.000       |
| leptin+ LPS               | 0  | 2573.9 | 4846.6 | 6409.1 | 6250.0 | 5019.9 | 1775.4 | 4 | 887.7 | 100.0        | 100.0  | 100.0  | 100.0  | 100.0 | 0.0  | 4 | 0.0  |             |
|                           | 1  | 2193.2 | 3977.3 | 4278.4 | 4460.2 | 3727.3 | 1041.9 | 4 | 521.0 | 85.2         | 82.1   | 66.8   | 71.4   | 76.3  | 8.7  | 4 | 4.4  | 0.001       |
|                           | 10 | 1738.6 | 3448.9 | 3403.4 | 3693.2 | 3071.0 | 897.3  | 4 | 448.7 | 67.5         | 71.2   | 53.1   | 59.1   | 62.7  | 8.2  | 4 | 4.1  | 0.000       |
|                           | 50 | 1511.4 | 2715.9 | 2983.0 | 2840.9 | 2512.8 | 676.5  | 4 | 338.2 | 58.7         | 56.0   | 46.5   | 45.5   | 51.7  | 6.7  | 4 | 3.3  | 0.000       |

### D. leptin\_IL-6

| IL-6 (pg/mL) lunasin(uM) |   | pg/ml  |        |        |        |      |     |   |     | % of control |        |        |        |       |     |   |     |             |
|--------------------------|---|--------|--------|--------|--------|------|-----|---|-----|--------------|--------|--------|--------|-------|-----|---|-----|-------------|
|                          |   | test 1 | test 2 | test 3 | test 4 | mean | SD  | n | SEM | test 1       | test 2 | test 3 | test 4 | mean  | SD  | n | SEM | LSD_p value |
| leptin 200ng/ml          | 0 | 15.9   | 7.4    | 9.9    | 8.9    | 10.5 | 3.7 | 4 | 1.9 | 100.0        | 100.0  | 100.0  | 100.0  | 100.0 | 0.0 | 4 | 0.0 |             |

|              |    |      |       |       |       |       |      |   |      |       |       |       |       |       |      |   |      |       |
|--------------|----|------|-------|-------|-------|-------|------|---|------|-------|-------|-------|-------|-------|------|---|------|-------|
|              | 1  | 4.9  | 9.4   | 6.9   | 9.4   | 7.6   | 2.2  | 4 | 1.1  | 30.6  | 127.2 | 69.5  | 105.6 | 83.3  | 42.4 | 4 | 21.2 | 0.443 |
|              | 10 | 7.4  | 7.9   | 7.9   | 10.4  | 8.4   | 1.4  | 4 | 0.7  | 46.4  | 106.8 | 79.7  | 116.9 | 87.5  | 31.6 | 4 | 15.8 | 0.564 |
|              | 50 | 6.9  | 5.3   | 6.9   | 6.9   | 6.5   | 0.8  | 4 | 0.4  | 43.2  | 72.8  | 69.5  | 77.4  | 65.7  | 15.4 | 4 | 7.7  | 0.128 |
| LPS 100ng/ml | 0  | 71.7 | 221.7 | 159.4 | 184.7 | 159.4 | 63.8 | 4 | 31.9 | 100.0 | 100.0 | 100.0 | 100.0 | 100.0 | 0.0  | 4 | 0.0  |       |
|              | 1  | 55.7 | 210.3 | 135.2 | 139.7 | 135.2 | 63.2 | 4 | 31.6 | 77.7  | 94.8  | 88.4  | 75.6  | 84.1  | 9.1  | 4 | 4.5  | 0.087 |
|              | 10 | 63.7 | 227.4 | 136.6 | 118.7 | 136.6 | 68.0 | 4 | 34.0 | 88.8  | 102.6 | 90.5  | 64.3  | 86.5  | 16.1 | 4 | 8.0  | 0.141 |
|              | 50 | 61.7 | 178.9 | 115.1 | 104.7 | 115.1 | 48.4 | 4 | 24.2 | 86.1  | 80.7  | 83.4  | 56.7  | 76.7  | 13.5 | 4 | 6.8  | 0.017 |
| leptin+ LPS  | 0  | 90.7 | 255.7 | 172.0 | 169.7 | 172.0 | 67.4 | 4 | 33.7 | 100.0 | 100.0 | 100.0 | 100.0 | 100.0 | 0.0  | 4 | 0.0  |       |
|              | 1  | 59.7 | 211.7 | 145.0 | 163.7 | 145.0 | 63.4 | 4 | 31.7 | 65.8  | 82.8  | 80.4  | 96.5  | 81.4  | 12.6 | 4 | 6.3  | 0.010 |
|              | 10 | 69.7 | 218.7 | 146.0 | 149.7 | 146.0 | 60.9 | 4 | 30.4 | 76.8  | 85.5  | 78.9  | 88.2  | 82.4  | 5.4  | 4 | 2.7  | 0.013 |
|              | 50 | 66.7 | 194.7 | 125.0 | 113.7 | 125.0 | 52.9 | 4 | 26.4 | 73.5  | 76.1  | 70.3  | 67.0  | 71.7  | 4.0  | 4 | 2.0  | 0.000 |

#### E. leptin\_TNF- $\alpha$

| TNF- $\alpha$<br>(pg/mL) | lunasin(u<br>M) | pg/ml   |         |         |         |         |        |   |        | % of control |        |        |        |       |       |   |       |             |
|--------------------------|-----------------|---------|---------|---------|---------|---------|--------|---|--------|--------------|--------|--------|--------|-------|-------|---|-------|-------------|
|                          |                 | test 1  | test 2  | test 3  | test 4  | mean    | SD     | n | SEM    | test 1       | test 2 | test 3 | test 4 | mean  | SD    | n | SEM   | LSD_p value |
| leptin 200ng/ml          | 0               | 64.7    | 63.7    | 53.7    | 72.7    | 63.7    | 7.8    | 4 | 3.9    | 100.0        | 100.0  | 100.0  | 100.0  | 100.0 | 0.0   | 4 | 0.0   |             |
|                          | 1               | 51.7    | 95.7    | 54.7    | 72.7    | 68.7    | 20.2   | 4 | 10.1   | 79.9         | 150.2  | 101.9  | 100.0  | 108.0 | 29.9  | 4 | 14.9  | 0.848       |
|                          | 10              | 98.7    | 53.7    | 99.7    | 137.7   | 97.5    | 34.4   | 4 | 17.2   | 152.6        | 84.3   | 185.7  | 189.4  | 153.0 | 48.7  | 4 | 24.3  | 0.217       |
|                          | 50              | 242.7   | 401.7   |         |         | 369.0   | 89.9   | 4 | 45.0   | 375.1        |        |        | 624.1  | 499.6 | 176.0 | 2 | 124.5 | 0.000       |
| LPS 100ng/ml             | 0               | 20342.5 | 17517.5 | 18767.5 | 26842.5 | 20867.5 | 4147.6 | 4 | 2073.8 | 100.0        | 100.0  | 100.0  | 100.0  | 100.0 | 0.0   | 4 | 0.0   |             |
|                          | 1               | 18242.5 | 17167.5 | 15867.5 | 21992.5 | 18317.5 | 2635.4 | 4 | 1317.7 | 89.7         | 98.0   | 84.5   | 81.9   | 88.5  | 7.1   | 4 | 3.5   | 0.247       |
|                          | 10              | 16192.5 | 17817.5 | 15717.5 | 15867.5 | 16398.8 | 966.4  | 4 | 483.2  | 79.6         | 101.7  | 83.7   | 59.1   | 81.0  | 17.5  | 4 | 8.7   | 0.065       |
|                          | 50              | 18467.5 | 17567.5 | 15742.5 | 16517.5 | 17073.8 | 1192.8 | 4 | 596.4  | 90.8         | 100.3  | 83.9   | 61.5   | 84.1  | 16.5  | 4 | 8.2   | 0.116       |
| leptin+ LPS              | 0               | 20342.5 | 19167.5 | 19467.5 | 19492.5 | 19617.5 | 505.4  | 4 | 252.7  | 100.0        | 100.0  | 100.0  | 100.0  | 100.0 | 0.0   | 4 | 0.0   |             |
|                          | 1               | 17217.5 | 18967.5 | 17467.5 | 14867.5 | 17130   | 1694.8 | 4 | 847.4  | 84.6         | 99.0   | 89.7   | 76.3   | 87.4  | 9.5   | 4 | 4.7   | 0.035       |
|                          | 10              | 17467.5 | 16467.5 | 15917.5 |         | 16617.5 | 785.9  | 3 | 453.7  | 85.9         | 85.9   | 81.8   |        | 84.5  | 2.4   | 3 | 1.4   | 0.133       |

|  |    |         |         |         |         |       |       |   |       |      |      |      |      |      |     |   |     |       |
|--|----|---------|---------|---------|---------|-------|-------|---|-------|------|------|------|------|------|-----|---|-----|-------|
|  | 50 | 17542.5 | 17167.5 | 16067.5 | 16342.5 | 16780 | 690.6 | 4 | 345.3 | 86.2 | 89.6 | 82.5 | 83.8 | 85.5 | 3.1 | 4 | 1.5 | 0.018 |
|--|----|---------|---------|---------|---------|-------|-------|---|-------|------|------|------|------|------|-----|---|-----|-------|

F. leptin\_IL-1 $\beta$

| IL-1 $\beta$ (pg/mL) lunasin(uM) |    | pg/ml  |        |        |        |      |      |   |      | % of control |        |        |        |       |      |   |     |             |
|----------------------------------|----|--------|--------|--------|--------|------|------|---|------|--------------|--------|--------|--------|-------|------|---|-----|-------------|
|                                  |    | test 1 | test 2 | test 3 | test 4 | mean | SD   | n | SEM  | test 1       | test 2 | test 3 | test 4 | mean  | SD   | n | SEM | LSD_p value |
| leptin<br>200ng/ml               | 0  | 10.8   | 10.7   | 10.3   | 9.5    | 10.3 | 0.6  | 4 | 0.3  | 100.0        | 100.0  | 100.0  | 100.0  | 100.0 | 0.0  | 4 | 0.0 |             |
|                                  | 1  | 10.5   | 10.2   | 9.3    | 9.5    | 9.9  | 0.6  | 4 | 0.3  | 96.9         | 95.3   | 90.3   | 100.0  | 95.6  | 4.0  | 4 | 2.0 | 0.134       |
|                                  | 10 | 10.5   | 10.7   | 9.7    | 9.3    | 10.0 | 0.6  | 4 | 0.3  | 96.9         | 100.0  | 93.5   | 98.2   | 97.2  | 2.7  | 4 | 1.4 | 0.318       |
|                                  | 50 | 10.7   | 9.7    | 9.8    | 8.2    | 9.6  | 1.0  | 4 | 0.5  | 98.5         | 90.6   | 95.2   | 86.0   | 92.6  | 5.4  | 4 | 2.7 | 0.017       |
| LPS 100ng/ml                     | 0  | 78.2   | 98.2   | 76.4   | 101.8  | 88.6 | 13.2 | 4 | 6.6  | 100.0        | 100.0  | 100.0  | 100.0  | 100.0 | 0.0  | 4 | 0.0 |             |
|                                  | 1  | 100.9  | 102.7  | 64.5   | 108.2  | 94.1 | 19.9 | 4 | 10.0 | 129.1        | 104.6  | 84.5   | 106.3  | 106.1 | 18.2 | 4 | 9.1 | 0.645       |
|                                  | 10 | 83.6   | 92.7   | 69.1   | 108.2  | 88.4 | 16.4 | 4 | 8.2  | 107.0        | 94.4   | 90.5   | 106.3  | 99.5  | 8.3  | 4 | 4.2 | 0.837       |
|                                  | 50 | 74.5   | 85.5   | 60.0   | 90.9   | 77.7 | 13.6 | 4 | 6.8  | 95.3         | 87.0   | 78.6   | 89.3   | 87.6  | 6.9  | 4 | 3.5 | 0.332       |
| leptin+ LPS                      | 0  |        | 93.6   | 84.5   | 117.3  | 98.5 | 16.9 | 3 | 9.8  |              | 100.0  | 100.0  | 100.0  | 100.0 | 0.0  | 3 | 0.0 |             |
|                                  | 1  |        | 102.7  | 70.0   | 96.4   | 89.7 | 17.4 | 3 | 10.0 |              | 109.7  | 82.8   | 82.2   | 91.6  | 15.7 | 3 | 9.1 | 0.378       |
|                                  | 10 |        | 84.5   | 70.9   | 122.7  | 92.7 | 26.9 | 3 | 15.5 |              | 90.3   | 83.9   | 104.7  | 92.9  | 10.6 | 3 | 6.1 | 0.460       |
|                                  | 50 |        | 73.6   | 60.0   | 90.9   | 74.8 | 15.5 | 3 | 8.9  |              | 78.6   | 71.0   | 77.5   | 75.7  | 4.1  | 3 | 2.4 | 0.024       |

**Figure 3. Lunasin inhibited inflammatory cytokine production in Ad-CM-conditioned RAW264.7 cells**

**A. Ad-CM %\_cell viability**

| Ad-CM               |        |        |            |        |        |            |        |        |            |        |        |            |                    |      |      |     |             |
|---------------------|--------|--------|------------|--------|--------|------------|--------|--------|------------|--------|--------|------------|--------------------|------|------|-----|-------------|
| Ad-CM               | test 1 |        |            | test 2 |        |            | test 3 |        |            | test 4 |        |            | viability%         |      |      |     |             |
| % of CM             | mean   | -blank | viability% | mean   | -blank | viability% | mean   | -blank | viability% | mean   | -blank | viability% | mean of viability% | SD   | n    | SEM | LSD_p value |
| blank               | 0.055  |        |            | 0.052  |        |            | 0.054  |        |            | 0.05   |        |            |                    |      |      |     |             |
| 0                   | 1.826  | 1.771  | 100.0      | 1.271  | 1.219  | 100.0      | 0.836  | 0.782  | 100.0      | 1.829  | 1.779  | 100.0      | 100.0              | 0.0  | 0.0  |     |             |
| 10                  | 1.931  | 1.876  | 105.8      | 1.706  | 1.654  | 134.2      | 0.857  | 0.803  | 102.7      | 1.804  | 1.754  | 98.6       | 110.3              | 16.2 | 8.1  |     | 0.230       |
| 25                  | 2.113  | 2.058  | 115.7      | 1.517  | 1.465  | 119.3      | 0.926  | 0.872  | 111.5      | 1.712  | 1.662  | 93.4       | 110.0              | 11.5 | 5.7  |     | 0.245       |
| 50                  |        |        |            | 1.333  | 1.281  | 104.9      | 0.819  | 0.765  | 97.7       | 1.513  | 1.463  | 82.3       | 95.0               | 11.6 | 6.7  |     | 0.577       |
| Ad-CM+LPS 100 ng/mL |        |        |            |        |        |            |        |        |            |        |        |            |                    |      |      |     |             |
| Ad-CM               | test 1 |        |            | test 2 |        |            | test 3 |        |            | test 4 |        |            | viability%         |      |      |     |             |
| % of CM             | mean   | -blank | viability% | mean   | -blank | viability% | mean   | -blank | viability% | mean   | -blank | viability% | mean of viability% | SD   | n    | SEM | LSD_p value |
| blank               | 0.055  |        |            | 0.052  |        |            | 0.054  |        |            | 0.05   |        |            |                    |      |      |     |             |
| 0                   | 2.382  | 2.327  | 100        | 1.393  | 1.341  | 100.0      | 0.976  | 0.922  | 100.0      | 2.426  | 2.376  | 100.0      | 100.0              | 0.0  | 0    |     |             |
| 10                  | 2.457  | 2.402  | 103.1      | 1.343  | 1.291  | 96.4       | 1.127  | 1.073  | 116.4      | 2.263  | 2.213  | 93.2       | 102.3              | 10.3 | 5.1  |     | 0.838       |
| 25                  | 2.365  | 2.310  | 99.3       | 1.954  | 1.902  | 140.3      | 0.961  | 0.907  | 98.3       | 2.056  | 2.006  | 84.424     | 105.6              | 24.1 | 12.1 |     | 0.618       |
| 50                  |        |        |            | 1.259  | 1.207  | 90.4       | 1.019  | 0.965  | 104.6      | 1.760  | 1.710  | 71.964     | 89.0               | 16.4 | 9.4  |     | 0.369       |

**B. Ad-CM %\_MCP-1**

| Ad-CM   |       |       |       |      |   |      |              |      |        |        |   |        |             |
|---------|-------|-------|-------|------|---|------|--------------|------|--------|--------|---|--------|-------------|
| Ad-CM   | pg/ml |       |       |      |   |      | % of control |      |        |        |   |        |             |
| % of CM | 1     | 2     | mean  | SD   | n | SEM  | 1            | 2    | mean   | SD     | n | SEM    | LSD_p value |
| 0       | 3.1   | 4.6   | 3.8   | 1.1  | 2 | 0.8  | 100          | 100  | 100.0  | 0.0    | 2 | 0.0    |             |
| 10      | 130.8 | 148.3 | 139.6 | 12.4 | 2 | 8.8  | 4289         | 3259 | 3773.9 | 727.7  | 2 | 514.6  | 0.022       |
| 25      | 196.3 | 220.8 | 208.6 | 17.3 | 2 | 12.3 | 6436         | 4853 | 5644.4 | 1119.6 | 2 | 791.7  | 0.005       |
| 50      | 250.8 | 277.3 | 264.1 | 18.7 | 2 | 13.3 | 8223         | 6095 | 7158.7 | 1505.0 | 2 | 1064.2 | 0.002       |

| Ad-CM+LPS 100 ng/mL |       |        |       |      |   |      |              |        |        |        |   |       |             |
|---------------------|-------|--------|-------|------|---|------|--------------|--------|--------|--------|---|-------|-------------|
| Ad-CM               | pg/ml |        |       |      |   |      | % of control |        |        |        |   |       |             |
| % of CM             | 1     | 2      | mean  | SD   | n | SEM  | 1            | 2      | mean   | SD     | n | SEM   | LSD_p value |
| 0                   | 138.0 | 48.0   | 93.0  | 63.6 | 2 | 45.0 | 100.0        | 100.0  | 100.0  | 0.0    | 2 | 0.0   |             |
| 10                  | 263.0 | 293.0  | 278.0 | 21.2 | 2 | 15.0 | 190.6        | 610.4  | 400.5  | 296.9  | 2 | 209.9 | 0.661       |
| 25                  | 533.0 | 615.5  | 574.3 | 58.3 | 2 | 41.3 | 386.2        | 1282.3 | 834.3  | 633.6  | 2 | 448.0 | 0.312       |
| 50                  | 943.0 | 1048.0 | 995.5 | 74.2 | 2 | 52.5 | 683.3        | 2183.3 | 1433.3 | 1060.7 | 2 | 750.0 | 0.104       |

### C. Ad-CM\_MCP-1

| MCP-1 (pg/mL) lunasin(uM) |    | pg/ml  |        |        |        |        |        |   |       | % of control |        |        |        |       |      |   |     |             |
|---------------------------|----|--------|--------|--------|--------|--------|--------|---|-------|--------------|--------|--------|--------|-------|------|---|-----|-------------|
|                           |    | test 1 | test 2 | test 3 | test 4 | mean   | SD     | n | SEM   | test 1       | test 2 | test 3 | test 4 | mean  | SD   | n | SEM | LSD_p value |
| Ad-CM                     | 0  | 464.0  | 528.3  | 403.3  | 467.1  | 442.1  | 68.8   | 4 | 34.4  | 100.0        | 100.0  | 100.0  | 100.0  | 100.0 | 0.0  | 4 | 0.0 |             |
|                           | 1  | 411.3  | 422.1  | 398.8  | 316.2  | 369.9  | 82.2   | 4 | 41.1  | 88.6         | 79.9   | 98.9   | 67.7   | 83.8  | 13.2 | 4 | 6.6 | 0.016       |
|                           | 10 | 426.5  | 448.8  | 374.7  | 370.8  | 385.7  | 69.3   | 4 | 34.6  | 91.9         | 85.0   | 92.9   | 79.4   | 87.3  | 6.4  | 4 | 3.2 | 0.047       |
|                           | 50 | 393.5  | 388.1  |        | 363.4  | 356.1  | 60.2   | 3 | 34.7  | 84.8         | 73.5   |        | 77.8   | 78.7  | 8.0  | 3 | 4.6 | 0.005       |
| LPS 100ng/ml              | 0  | 1146.2 | 2174.2 | 1524.2 | 4872.2 | 2429.2 | 1683.1 | 4 | 841.5 | 100.0        | 100.0  | 100.0  | 100    | 100.0 | 0.0  | 4 | 0.0 |             |
|                           | 1  | 1022.2 | 2064.2 | 1440.2 | 4816.7 | 2335.8 | 1708.4 | 4 | 854.2 | 89.2         | 94.9   | 94.5   | 98.9   | 94.4  | 4.0  | 4 | 2.0 | 0.385       |
|                           | 10 | 1124.2 | 1586.2 | 1204.2 | 4879.6 | 2198.6 | 1798.7 | 4 | 899.3 | 98.1         | 73.0   | 79.0   | 100.2  | 87.5  | 13.6 | 4 | 6.8 | 0.070       |
|                           | 50 | 1040.2 | 1490.2 | 1376.2 | 4201.9 | 2027.1 | 1462.4 | 4 | 731.2 | 90.8         | 68.5   | 90.3   | 86.2   | 83.9  | 10.5 | 4 | 5.2 | 0.024       |
| Ad-CM+ LPS                | 0  | 712.2  | 1396.2 | 1342.2 | 4357.4 | 1952.0 | 1633.4 | 4 | 816.7 | 100.0        | 100.0  | 100.0  | 100.0  | 100.0 | 0.0  | 4 | 0.0 |             |
|                           | 1  | 686.2  | 1474.2 | 992.2  | 3538.9 | 1672.9 | 1285.6 | 4 | 642.8 | 96.3         | 105.6  | 73.9   | 81.2   | 89.3  | 14.3 | 4 | 7.2 | 0.343       |
|                           | 10 | 702.2  | 1104.2 | 1076.2 | 2964.8 | 1461.9 | 1018.6 | 4 | 509.3 | 98.6         | 79.1   | 80.2   | 68.0   | 81.5  | 12.7 | 4 | 6.3 | 0.129       |
|                           | 50 | 588.2  | 1086.2 | 1110.2 | 3264.8 | 1512.4 | 1192.8 | 4 | 596.4 | 82.6         | 77.8   | 82.7   | 74.9   | 79.5  | 3.8  | 4 | 1.9 | 0.017       |

### D. Ad-CM\_IL-6

| IL-6 (pg/mL) lunasin(uM) |  | pg/ml  |        |        |        |      |    |   |     | % of control |        |        |        |      |    |   |     |             |
|--------------------------|--|--------|--------|--------|--------|------|----|---|-----|--------------|--------|--------|--------|------|----|---|-----|-------------|
|                          |  | test 1 | test 2 | test 3 | test 4 | mean | SD | n | SEM | test 1       | test 2 | test 3 | test 4 | mean | SD | n | SEM | LSD_p value |



|                   |    |      |       |        |        |       |       |   |     |       |       |       |       |       |      |   |      |       |
|-------------------|----|------|-------|--------|--------|-------|-------|---|-----|-------|-------|-------|-------|-------|------|---|------|-------|
| Ad-CM<br>200ng/ml | 0  | 12.8 | 9.3   | 9.7    | 12.4   | 11.0  | 1.8   | 4 | 0.9 | 100.0 | 100.0 | 100.0 | 100.0 | 100.0 | 0.0  | 4 | 0.0  |       |
|                   | 1  | 10.5 | 9.7   | 10.1   | 8.9    | 9.8   | 0.7   | 4 | 0.3 | 81.9  | 104.1 | 104.0 | 72.0  | 90.5  | 16.1 | 4 | 8.1  | 0.444 |
|                   | 10 | 14.3 | 8.9   | 9.3    | 9.3    | 10.5  | 2.6   | 4 | 1.3 | 112.0 | 95.9  | 96.0  | 75.2  | 94.8  | 15.1 | 4 | 7.6  | 0.671 |
|                   | 50 | 15.1 | 8.9   |        | 8.9    | 11.0  | 3.6   | 3 | 2.1 | 118.1 | 95.9  |       | 72.0  | 95.3  | 23.0 | 3 | 13.3 | 0.725 |
| LPS 100ng/ml      | 0  |      | 420.6 | 1038.3 | 1016.9 | 825.3 | 350.6 | 3 | 202 |       | 100.0 | 100.0 | 100.0 | 100.0 | 0.0  | 3 | 0.0  |       |
|                   | 1  |      | 323.4 | 859.6  | 704.9  | 629.3 | 276.0 | 3 | 159 |       | 76.9  | 82.8  | 69.3  | 76.3  | 6.8  | 3 | 3.9  | 0.093 |
|                   | 10 |      | 254.9 | 799.6  | 622.3  | 558.9 | 277.8 | 3 | 160 |       | 60.6  | 77.0  | 61.2  | 66.3  | 9.3  | 3 | 5.4  | 0.013 |
|                   | 50 |      | 283.9 | 828.9  | 574.3  | 581.3 | 244.3 | 3 | 141 |       | 67.5  | 79.8  | 56.5  | 67.9  | 11.7 | 3 | 6.7  | 0.001 |
| Ad-CM+ LPS        | 0  | 94.8 | 153.4 | 744.7  | 196.3  | 297.3 | 301.1 | 4 | 151 | 100.0 | 100.0 | 100.0 | 100.0 | 100.0 | 0.0  | 4 | 0.0  |       |
|                   | 1  | 86.3 | 126.3 | 700.7  |        | 304.4 | 343.7 | 3 | 160 | 91.1  | 82.3  | 94.1  |       | 89.2  | 6.1  | 3 | 3.5  | 0.226 |
|                   | 10 | 92.5 | 86.3  | 583.3  | 160.6  | 230.7 | 237.5 | 4 | 119 | 97.6  | 56.2  | 78.3  | 81.8  | 78.5  | 17.0 | 4 | 8.5  | 0.017 |
|                   | 50 | 83.2 | 149.1 | 470.0  | 134.9  | 209.3 | 176.1 | 4 | 88  | 87.8  | 97.2  | 63.1  | 68.7  | 79.2  | 16.0 | 4 | 8.0  | 0.020 |

#### E. Ad-CM\_TNF- $\alpha$

| TNF- $\alpha$ (pg/mL) lunasin(uM) |    | pg/ml   |         |         |         |        |   |        | % of control |        |        |       |      |   |      |             |
|-----------------------------------|----|---------|---------|---------|---------|--------|---|--------|--------------|--------|--------|-------|------|---|------|-------------|
|                                   |    | test 1  | test 2  | test 3  | mean    | SD     | n | SEM    | test 1       | test 2 | test 3 | mean  | SD   | n | SEM  | LSD_p value |
| Ad-CM 200ng/ml                    | 0  | 457.2   | 272.0   | 346.3   | 358.5   | 93.2   | 3 | 53.8   | 100.0        | 100.0  | 100.0  | 100.0 | 0.0  | 3 | 0.0  |             |
|                                   | 1  | 117.2   | 239.4   | 374.5   | 243.7   | 128.7  | 3 | 74.3   | 25.6         | 88.0   | 108.1  | 73.9  | 43.0 | 3 | 24.8 | 0.363       |
|                                   | 10 | 275.4   | 313.4   | 369.9   | 319.6   | 47.6   | 3 | 27.5   | 60.2         | 115.2  | 106.8  | 94.1  | 29.6 | 3 | 17.1 | 0.808       |
|                                   | 50 | 114.5   |         | 379.9   | 247.2   | 187.7  | 2 | 132.7  | 25.0         |        | 109.7  | 67.4  | 59.9 | 2 | 42.3 | 0.345       |
| LPS 100ng/ml                      | 0  | 11907.3 | 14089.1 | 12525.5 | 12840.6 | 1124.5 | 3 | 649.3  | 100.0        | 100.0  | 100.0  | 100.0 | 0.0  | 3 | 0.0  |             |
|                                   | 1  | 8089.1  | 10070.9 | 10161.8 | 9440.6  | 1171.3 | 3 | 676.3  | 67.9         | 71.5   | 81.1   | 73.5  | 6.8  | 3 | 3.9  | 0.018       |
|                                   | 10 | 6834.5  | 10925.5 | 13034.5 | 10264.8 | 3152.3 | 3 | 1820.1 | 57.4         | 77.5   | 104.1  | 79.7  | 23.4 | 3 | 13.5 | 0.024       |
|                                   | 50 | 5998.2  | 10198.2 | 12380.0 | 9525.5  | 3243.7 | 3 | 1872.8 | 50.4         | 72.4   | 98.8   | 73.9  | 24.3 | 3 | 14.0 | 0.016       |
| Ad-CM+ LPS                        | 0  | 11198.2 | 13234.5 | 15107.3 | 13180.0 | 1955.1 | 3 | 1128.8 | 100.0        | 100.0  | 100.0  | 100.0 | 0.0  | 3 | 0.0  |             |
|                                   | 1  | 9325.5  | 10889.1 | 11961.8 | 10725.5 | 1325.8 | 3 | 765.5  | 83.3         | 82.3   | 79.2   | 81.6  | 2.1  | 3 | 1.2  | 0.001       |

|  |    |        |         |         |         |        |   |        |      |      |      |      |      |   |     |       |
|--|----|--------|---------|---------|---------|--------|---|--------|------|------|------|------|------|---|-----|-------|
|  | 10 | 8034.5 | 11743.6 | 12707.3 | 10828.5 | 2467.1 | 3 | 1424.4 | 71.7 | 88.7 | 84.1 | 81.5 | 8.8  | 3 | 5.1 | 0.002 |
|  | 50 | 7452.7 | 10343.6 | 14089.1 | 10628.5 | 3327.3 | 3 | 1921.1 | 66.6 | 78.2 | 93.3 | 79.3 | 13.4 | 3 | 7.7 | 0.000 |

F. Ad-CM\_IL-1 $\beta$

| IL-1 $\beta$ (pg/mL) | lunasin(uM) | pg/ml  |        |        |        |       |       |   |      | % of control |        |        |        |       |      |   |      |             |
|----------------------|-------------|--------|--------|--------|--------|-------|-------|---|------|--------------|--------|--------|--------|-------|------|---|------|-------------|
|                      |             | test 1 | test 2 | test 3 | test 4 | mean  | SD    | n | SEM  | test 1       | test 2 | test 3 | test 4 | mean  | SD   | n | SEM  | LSD_p value |
| Ad-CM<br>200ng/ml    | 0           | 10.0   | 11.2   | 7.1    | 10.0   | 9.6   | 1.8   | 4 | 0.9  | 100.0        | 100.0  | 100.0  | 100.0  | 100.0 | 0.0  | 4 | 0.0  | 0.015       |
|                      | 1           | 6.6    | 8.6    | 6.7    | 9.1    | 7.8   | 1.3   | 4 | 0.7  | 65.5         | 76.9   | 95.1   | 91.4   | 82.2  | 13.6 | 4 | 6.8  |             |
|                      | 10          | 6.2    | 9.0    | 6.7    | 9.0    | 7.7   | 1.5   | 4 | 0.7  | 62.1         | 80.0   | 95.1   | 89.7   | 81.7  | 14.5 | 4 | 7.3  |             |
|                      | 50          | 7.8    | 8.8    | 7.6    | 8.8    | 8.2   | 0.7   | 4 | 0.3  | 77.6         | 78.5   | 107.3  | 87.9   | 87.8  | 13.8 | 4 | 6.9  |             |
| LPS 100ng/ml         | 0           | 119.7  | 274.4  | 349.2  | 195.8  | 234.8 | 99.0  | 4 | 49.5 | 100.0        | 100.0  | 100.0  | 100.0  | 100.0 | 0.0  | 4 | 0.0  | 0.004       |
|                      | 1           | 66.0   | 177.6  | 182.8  | 150.8  | 144.3 | 54.1  | 4 | 27.0 | 55.1         | 64.7   | 79.6   | 77.0   | 69.1  | 11.4 | 4 | 5.7  |             |
|                      | 10          | 70.2   | 160.7  | 241.8  | 200.8  | 168.4 | 73.3  | 4 | 36.7 | 58.7         | 58.6   | 90.5   | 102.6  | 77.6  | 22.4 | 4 | 11.2 |             |
|                      | 50          | 82.8   | 189.2  | 191.3  | 169.5  | 158.2 | 51.2  | 4 | 25.6 | 69.2         | 68.9   | 89.1   | 86.6   | 78.5  | 10.9 | 4 | 5.4  |             |
| Ad-CM+ LPS           | 0           | 73.4   | 299.7  | 332.3  | 190.8  | 224.0 | 117.3 | 4 | 58.6 | 100.0        | 100.0  | 100.0  | 100.0  | 100.0 | 0.0  | 4 | 0.0  | 0.056       |
|                      | 1           | 57.6   | 230.2  | 269.2  | 183.3  | 185.0 | 92.0  | 4 | 46.0 | 78.5         | 76.8   | 93.7   | 96.1   | 86.3  | 10.0 | 4 | 5.0  |             |
|                      | 10          | 67.1   | 259.7  | 293.4  | 203.3  | 205.8 | 99.7  | 4 | 49.9 | 91.4         | 86.7   | 81.1   | 106.6  | 91.4  | 10.9 | 4 | 5.5  |             |
|                      | 50          |        | 179.7  | 134.4  | 139.5  | 151.2 | 24.8  | 3 | 14.3 |              | 60.0   | 71.7   | 73.1   | 68.3  | 7.2  | 3 | 4.2  |             |

**Figure 4. Lunasin abated inflammatory cytokine production in the RAW264.7 cell and mature 3T3-L1 adipocyte co-culture**

B.

|                  | ng/m  |       |       |      |     |   |     | LSD     |
|------------------|-------|-------|-------|------|-----|---|-----|---------|
|                  | test1 | test2 | test3 | MEAN | SD  | n | SEM | p value |
| 3T3-only         | 0.3   | 0.3   | 0.3   | 0.3  | 0.0 | 3 | 0.0 | 0.3067  |
| RAW-only         | 0.0   | 0.0   | 0.0   | 0.0  | 0.0 | 3 | 0.0 | 0.2980  |
| cocu-control     | 3.1   | 3.2   | 3.8   | 3.4  | 0.4 | 3 | 0.2 |         |
| cocu+lps-control | 95.9  | 104.6 | 99.3  | 99.9 | 4.4 | 3 | 2.5 | 0.0000  |

C. co-culture\_cytokine

| MCP-1 | pg/ml  |        |        |      |     |   |     | % of control |        |        |       |     |   |     |             |
|-------|--------|--------|--------|------|-----|---|-----|--------------|--------|--------|-------|-----|---|-----|-------------|
|       | test 1 | test 2 | test 3 | mean | SD  | n | SEM | test 1       | test 2 | test 3 | mean  | SD  | n | SEM | LSD_p value |
| 0     | 95.9   | 104.6  | 99.3   | 99.9 | 4.4 | 3 | 2.5 | 100.0        | 100.0  | 100.0  | 100.0 | 0.0 | 3 | 0.0 |             |
| 10    | 88.0   | 106.4  | 92.8   | 95.7 | 9.5 | 3 | 5.5 | 91.8         | 101.8  | 93.4   | 95.7  | 5.4 | 3 | 3.1 | 0.807       |
| 50    | 91.2   | 97.2   | 86.4   | 91.6 | 5.4 | 3 | 3.1 | 95.1         | 93.0   | 87.0   | 91.7  | 4.2 | 3 | 2.4 | 0.640       |

| IL-6 | pg/ml  |        |        |        |      |     |   |     | % of control |        |        |        |       |      |   |     |             |
|------|--------|--------|--------|--------|------|-----|---|-----|--------------|--------|--------|--------|-------|------|---|-----|-------------|
|      | test 1 | test 2 | test 3 | test 4 | mean | SD  | n | SEM | test 1       | test 2 | test 3 | test 4 | mean  | SD   | n | SEM | LSD p value |
| 0    | 7.06   | 17.3   | 20.6   | 14.9   | 15.0 | 5.8 | 4 | 2.9 | 100.0        | 100.0  | 100.0  | 100.0  | 100.0 | 0.0  | 4 | 0.0 |             |
| 10   | 6.66   | 18.6   | 23.1   | 17.7   | 16.5 | 7.0 | 4 | 3.5 | 94.3         | 107.9  | 112.1  | 118.7  | 108.3 | 10.3 | 4 | 5.1 | 0.047       |
| 50   | 6.17   | 16.5   | 19.2   | 13.3   | 13.8 | 5.6 | 4 | 2.8 | 87.4         | 95.4   | 93.1   | 89.5   | 91.3  | 3.6  | 4 | 1.8 | 0.037       |

| TNF- $\alpha$ | pg/ml  |        |        |        |      |      |   |     | % of control |        |        |        |       |      |   |     |             |
|---------------|--------|--------|--------|--------|------|------|---|-----|--------------|--------|--------|--------|-------|------|---|-----|-------------|
|               | test 1 | test 2 | test 3 | test 4 | mean | SD   | n | SEM | test 1       | test 2 | test 3 | test 4 | mean  | SD   | n | SEM | LSD_p value |
| 0             | 1.9    | 2.7    | 4.1    | 2.6    | 2.9  | 0.92 | 4 | 0.5 | 100.0        | 100.0  | 100.0  | 100.0  | 100.0 | 0.0  | 4 | 0.0 |             |
| 10            | 2.1    | 2.9    | 2.9    | 2.4    | 2.6  | 0.39 | 4 | 0.2 | 108.0        | 105.4  | 70.4   | 92.1   | 94.0  | 17.2 | 4 | 8.6 | 0.516       |
| 50            |        | 1.9    | 3.8    | 2.4    | 2.7  | 0.99 | 3 | 0.6 |              | 69.2   | 91.8   | 89.0   | 83.4  | 12.3 | 3 | 7.1 | 0.107       |

| IL-1 $\beta$ | pg/ml  |        |        |        |      |      |   |     | % of control |        |        |        |       |      |   |      |             |
|--------------|--------|--------|--------|--------|------|------|---|-----|--------------|--------|--------|--------|-------|------|---|------|-------------|
|              | test 1 | test 2 | test 3 | test 4 | mean | SD   | n | SEM | test 1       | test 2 | test 3 | test 4 | mean  | SD   | n | SEM  | LSD_p value |
| 0            | 66.5   | 46.5   | 37.1   | 40.9   | 47.8 | 13.1 | 4 | 6.5 | 100.0        | 100.0  | 100.0  | 100.0  | 100.0 | 0.0  | 4 | 0.0  |             |
| 10           | 50.9   | 35.9   | 28.7   | 35.4   | 37.7 | 9.4  | 4 | 4.7 | 76.6         | 77.3   | 77.5   | 86.4   | 79.5  | 4.7  | 4 | 2.3  | 0.081       |
| 50           | 37.1   |        | 32.6   | 47.6   | 41.2 | 7.6  | 4 | 3.8 | 55.7         |        | 88.0   | 116.3  | 86.7  | 30.3 | 3 | 17.5 | 0.298       |

**Fig 5\_Lunasin inhibited pro-inflammatory adipokine production in 3T3-L1 adipocytes**

A. MCP-1

MCP-1\_DMEM1%FBS

| MCP-1         | pg/ml  |        |        |        | mean  | SD    | SEM   | n | LSD_p value | % of control |        |        |        | mean  | SD   | SEM | n | LSD_p value |
|---------------|--------|--------|--------|--------|-------|-------|-------|---|-------------|--------------|--------|--------|--------|-------|------|-----|---|-------------|
|               | test 1 | test 2 | test 3 | test 4 |       |       |       |   |             | test 1       | test 2 | test 3 | test 4 |       |      |     |   |             |
| control       | 516.2  | 437.9  | 485.6  | 360.7  | 450.1 | 67.73 | 33.86 | 4 |             | 100.0        | 100.0  | 100.0  | 100.0  | 100.0 | 0.0  | 0.0 | 4 |             |
| Lunasin 5 uM  | 450.9  | 524.1  | 441.7  | 322.2  | 418.9 | 80.65 | 36.07 | 5 | 0.573       | 87.4         | 119.7  | 91.0   | 89.3   | 96.8  | 15.3 | 6.8 | 4 | 0.759       |
| Lunasin 25 uM | 393.0  | 525.6  | 466.1  | 313.9  | 419.5 | 80.17 | 35.85 | 5 | 0.581       | 76.1         | 120.0  | 96.0   | 87.0   | 94.8  | 18.7 | 8.4 | 4 | 0.612       |
| Lunasin 50 uM | 403.1  | 429.2  | 439.3  |        | 401.1 | 48.00 | 24.00 | 4 | 0.405       | 78.1         | 98.0   | 90.5   |        | 88.9  | 10.1 | 5.0 | 3 | 0.324       |

MCP-1\_TNF-a 10 ng/ml

| MCP-1         | pg/ml   |         |         |         | mean    | SD       | SEM     | n | LSD_p value | % of control |        |        | mean  | SD   | SEM | n | LSD_p value |
|---------------|---------|---------|---------|---------|---------|----------|---------|---|-------------|--------------|--------|--------|-------|------|-----|---|-------------|
|               | test 1  | test 2  | test 3  | test 4  |         |          |         |   |             | test 1       | test 2 | test 3 |       |      |     |   |             |
| control       | 89072.5 | 89072.5 | 90231.9 |         | 89458.9 | 669.39   | 386.47  | 3 |             | 100.0        | 100.0  | 100.0  | 100.0 | 0.0  | 0.0 | 3 |             |
| Lunasin 5 uM  | 75739.1 | 81246.4 | 54000.0 | 86753.6 | 74434.8 | 14346.12 | 7173.06 | 4 | 0.079       | 91.2         | 60.6   | 96.1   | 82.7  | 19.2 | 9.6 | 3 | 0.110       |
| Lunasin 25 uM | 76608.7 | 75739.1 | 87333.3 | 79797.1 | 79869.6 | 5272.79  | 2636.39 | 4 | 0.246       | 85.0         | 98.0   | 88.4   | 90.5  | 6.8  | 3.4 | 3 | 0.359       |
| Lunasin 50 uM | 57478.3 | 66753.6 | 62985.5 | 89652.2 | 69217.4 | 14145.60 | 7072.80 | 4 | 0.023       | 74.9         | 70.7   | 99.4   | 81.7  | 15.5 | 7.7 | 3 | 0.094       |

MCP-1\_50%RAW-CM

| MCP-1 | pg/ml |  |  |  | mean | SD | SEM | n | LSD_p value | % of control |  |  | mean | SD | SEM | n | LSD_p value |
|-------|-------|--|--|--|------|----|-----|---|-------------|--------------|--|--|------|----|-----|---|-------------|
|-------|-------|--|--|--|------|----|-----|---|-------------|--------------|--|--|------|----|-----|---|-------------|

| test          | 1        | 2        | 3        |          |         |       |   |       | 1     | 2     | 3     |       |      |     |   |       |
|---------------|----------|----------|----------|----------|---------|-------|---|-------|-------|-------|-------|-------|------|-----|---|-------|
| control       | 224024.4 | 182561.0 | 171097.6 | 192561.0 | 27844.4 | 16076 | 3 |       | 100.0 | 100.0 | 100.0 | 100.0 | 0.0  | 0.0 | 3 |       |
| Lunasin 5 uM  | 245243.9 | 174756.1 | 155975.6 | 191991.9 | 47063.9 | 27172 | 3 | 0.985 | 109.5 | 95.7  | 91.2  | 98.8  | 9.5  | 5.5 | 3 | 0.870 |
| Lunasin 25 uM | 235000.0 | 190609.8 | 172561.0 | 199390.2 | 32132.2 | 18552 | 3 | 0.820 | 104.9 | 104.4 | 100.9 | 103.4 | 2.2  | 1.3 | 3 | 0.644 |
| Lunasin 50 uM | 181341.5 | 194756.1 | 130122.0 | 168739.8 | 34110.0 | 19693 | 3 | 0.434 | 80.9  | 106.7 | 76.1  | 87.9  | 16.5 | 9.5 | 3 | 0.121 |

#### MCP-1\_LPS 1000 ng/ml

| MCP-1         | pg/ml   |         |         | mean    | SD      | SEM  | n | LSD_p value | % of control |       |       | mean  | SD   | SEM  | n | LSD_p value |
|---------------|---------|---------|---------|---------|---------|------|---|-------------|--------------|-------|-------|-------|------|------|---|-------------|
| test          | 1       | 2       | 3       |         |         |      |   |             | 1            | 2     | 3     |       |      |      |   |             |
| control       | 35762.2 | 55335.4 | 30152.4 | 40416.7 | 13220.9 | 7633 | 3 |             | 100.0        | 100.0 | 100.0 | 100.0 | 0.0  | 0.0  | 3 |             |
| Lunasin 5 uM  | 27957.3 | 32408.5 | 26493.9 | 28953.3 | 3080.5  | 1779 | 3 | 0.147       | 78.2         | 58.6  | 87.9  | 74.9  | 14.9 | 8.6  | 3 | 0.022       |
| Lunasin 25 uM | 33628.0 | 45762.2 | 25823.2 | 35071.1 | 10047.5 | 5801 | 3 | 0.481       | 94.0         | 82.7  | 85.6  | 87.4  | 5.9  | 3.4  | 3 | 0.205       |
| Lunasin 50 uM | 24359.8 | 39969.5 | 30701.2 | 31676.8 | 7850.5  | 4532 | 3 | 0.259       | 68.1         | 72.2  | 101.8 | 80.7  | 18.4 | 10.6 | 3 | 0.064       |

#### B. PAI-1

##### PAI-1\_DMED1%FBS

| PAI-1         | ng/ml |      |     |     | mean | SD  | SEM | n | LSD_p value | % of control |       |       |       | mean  | SD   | SEM | n | LSD_p value |
|---------------|-------|------|-----|-----|------|-----|-----|---|-------------|--------------|-------|-------|-------|-------|------|-----|---|-------------|
| test          | 1     | 2    | 3   | 4   |      |     |     |   |             | 1            | 2     | 3     | 4     |       |      |     |   |             |
| control       | 13.8  | 14.9 | 4.1 | 4.0 | 9.2  | 6.6 | 3.3 | 4 |             | 100.0        | 100.0 | 100.0 | 100.0 | 100.0 | 0.0  | 0.0 | 4 |             |
| Lunasin 5 uM  | 13.6  | 15.9 | 4.5 | 4.6 | 9.7  | 6.7 | 3.4 | 4 | 0.917       | 98.8         | 107.3 | 110.1 | 114.4 | 107.7 | 6.6  | 3.3 | 4 | 0.310       |
| Lunasin 25 uM | 12.4  | 15.7 | 5.3 | 4.7 | 9.5  | 6.3 | 3.2 | 4 | 0.940       | 90.5         | 105.6 | 128.4 | 114.9 | 109.8 | 16.0 | 8.0 | 4 | 0.196       |
| Lunasin 50 uM | 12.5  | 16.4 | 3.9 | 4.7 | 9.4  | 6.7 | 3.4 | 4 | 0.968       | 90.8         | 110.1 | 94.9  | 116.0 | 102.9 | 12.0 | 6.0 | 4 | 0.691       |

##### PAI-1\_TNF-a 10 ng/ml

| PAI-1         | ng/ml |      |      |      | mean | SD  | SEM | n | LSD_p value | % of control |       |       |       | mean  | SD  | SEM | n | LSD_p value |
|---------------|-------|------|------|------|------|-----|-----|---|-------------|--------------|-------|-------|-------|-------|-----|-----|---|-------------|
| test          | 1     | 2    | 3    | 4    |      |     |     |   |             | 1            | 2     | 3     | 4     |       |     |     |   |             |
| control       | 16.9  | 22.3 | 10.7 | 13.5 | 15.9 | 8.3 | 4.2 | 4 |             | 100.0        | 100.0 | 100.0 | 100.0 | 100.0 | 0.0 | 0.0 | 4 |             |
| Lunasin 5 uM  | 17.9  | 18.5 | 10.2 | 13.3 | 15.0 | 7.5 | 3.8 | 4 | 0.747       | 106.3        | 82.8  | 95.1  | 98.3  | 95.6  | 9.7 | 4.9 | 4 | 0.536       |
| Lunasin 25 uM | 15.6  | 10.5 | 12.1 |      | 12.7 | 6.7 | 3.9 | 3 | 0.297       | 92.3         | 97.5  | 89.4  |       | 93.1  | 4.1 | 2.4 | 3 | 0.368       |

|               |      |      |      |  |      |     |     |   |       |      |      |      |  |      |     |     |   |       |
|---------------|------|------|------|--|------|-----|-----|---|-------|------|------|------|--|------|-----|-----|---|-------|
| Lunasin 50 uM | 15.6 | 10.3 | 12.8 |  | 12.9 | 6.8 | 3.9 | 3 | 0.323 | 92.2 | 95.9 | 94.4 |  | 94.2 | 1.9 | 1.1 | 3 | 0.447 |
|---------------|------|------|------|--|------|-----|-----|---|-------|------|------|------|--|------|-----|-----|---|-------|

**PAI-1\_50%RAW-CM**

| PAI-1         | ng/ml |       |       |       | mean  | SD   | SEM  | n | LSD_p value | % of control |       |       |       | mean  | SD   | SEM | n | LSD_p value |
|---------------|-------|-------|-------|-------|-------|------|------|---|-------------|--------------|-------|-------|-------|-------|------|-----|---|-------------|
| test          | 1     | 2     | 3     | 4     |       |      |      |   |             | 1            | 2     | 3     | 4     |       |      |     |   |             |
| control       | 163.0 | 130.7 | 131.1 | 140.0 | 144.7 | 73.6 | 42.5 | 4 |             | 100.0        | 100.0 | 100.0 | 100.0 | 100.0 | 0.0  | 0.0 | 4 |             |
| Lunasin 5 uM  | 110.0 | 129.6 | 128.2 |       | 122.6 | 61.9 | 35.8 | 3 | 0.092       | 67.5         | 98.9  | 91.5  |       | 86.0  | 16.4 | 9.5 | 3 | 0.117       |
| Lunasin 25 uM | 116.1 | 104.6 | 127.8 |       | 116.2 | 58.8 | 34.0 | 3 | 0.030       | 71.2         | 79.8  | 91.2  |       | 80.8  | 10.0 | 5.8 | 3 | 0.039       |
| Lunasin 50 uM | 101.9 | 105.3 | 104.0 | 135.7 | 113.9 | 59.0 | 34.1 | 4 | 0.009       | 62.5         | 80.5  | 79.3  | 96.9  | 79.8  | 14.0 | 7.0 | 4 | 0.022       |

**PAI-1\_LPS 1000 ng/ml**

| PAI-1         | ng/ml |      |     |     | mean | SD  | SEM | n | LSD_p value | % of control |       |       |       | mean  | SD   | SEM | n | LSD_p value |
|---------------|-------|------|-----|-----|------|-----|-----|---|-------------|--------------|-------|-------|-------|-------|------|-----|---|-------------|
| test          | 1     | 2    | 3   | 4   |      |     |     |   |             | 1            | 2     | 3     | 4     |       |      |     |   |             |
| control       | 17.2  | 23.9 | 7.9 | 8.2 | 14.3 | 9.2 | 4.6 | 4 |             | 100.0        | 100.0 | 100.0 | 100.0 | 100.0 | 0.0  | 0.0 | 4 |             |
| Lunasin 5 uM  | 17.8  | 18.5 | 6.7 | 7.7 | 12.7 | 7.9 | 3.9 | 4 | 0.726       | 103.9        | 77.5  | 84.7  | 93.4  | 89.9  | 11.4 | 5.7 | 4 | 0.091       |
| Lunasin 25 uM | 15.7  | 18.7 | 6.7 | 7.5 | 12.1 | 7.5 | 3.7 | 4 | 0.643       | 91.4         | 78.2  | 84.7  | 91.6  | 86.5  | 6.4  | 3.2 | 4 | 0.029       |
| Lunasin 50 uM | 16.2  | 17.3 | 6.4 | 7.3 | 11.8 | 7.3 | 3.6 | 4 | 0.590       | 94.7         | 72.6  | 80.8  | 89.1  | 84.3  | 9.7  | 4.8 | 4 | 0.013       |

**C. leptin**

**leptin\_DMED1%FBS**

| leptin        | pg/ml |       |      |       | mean | SD    | SEM   | n | LSD_p value | % of control |       |       |       | mean  | SD   | SEM  | n | LSD_p value |
|---------------|-------|-------|------|-------|------|-------|-------|---|-------------|--------------|-------|-------|-------|-------|------|------|---|-------------|
| test          | 1     | 2     | 3    | 4     |      |       |       |   |             | 1            | 2     | 3     | 4     |       |      |      |   |             |
| control       | 85.6  | 113.6 | 56.6 | 94.6  | 87.6 | 23.73 | 11.87 | 4 |             | 100.0        | 100.0 | 100.0 | 100.0 | 100.0 | 0.0  | 0.0  | 4 |             |
| Lunasin 5 uM  | 93.6  | 103.6 | 44.6 | 86.6  | 82.1 | 25.96 | 12.98 | 4 | 0.766       | 109.3        | 91.2  | 78.8  | 91.5  | 92.7  | 12.6 | 6.3  | 4 | 0.538       |
| Lunasin 25 uM | 40.6  | 77.6  | 45.6 | 89.6  | 58.6 | 23.98 | 11.99 | 4 | 0.201       | 47.4         | 68.3  | 80.6  | 94.7  | 72.8  | 20.0 | 10.0 | 4 | 0.033       |
| Lunasin 50 uM | 63.6  | 83.6  | 49.6 | 109.6 | 76.6 | 26.05 | 13.03 | 4 | 0.553       | 74.3         | 73.6  | 87.6  | 115.9 | 87.8  | 19.8 | 9.9  | 4 | 0.311       |

**leptin\_TNF-a 10 ng/ml**

| leptin | pg/ml |   |   |   | mean | SD | SEM | n | LSD_p value | % of control |   |   |   | mean | SD | SEM | n | LSD_p value |
|--------|-------|---|---|---|------|----|-----|---|-------------|--------------|---|---|---|------|----|-----|---|-------------|
| test   | 1     | 2 | 3 | 4 |      |    |     |   |             | 1            | 2 | 3 | 4 |      |    |     |   |             |

|               |       |       |       |      |       |        |       |   |       |       |       |       |       |       |      |     |   |       |
|---------------|-------|-------|-------|------|-------|--------|-------|---|-------|-------|-------|-------|-------|-------|------|-----|---|-------|
| control       | 814.6 | 111.6 | 100.6 | 63.6 | 272.6 | 361.92 | 181.0 | 4 |       | 100.0 | 100.0 | 100.0 | 100.0 | 100.0 | 0.0  | 0.0 | 4 |       |
| Lunasin 5 uM  | 694.6 | 104.6 | 87.6  | 71.6 | 239.6 | 303.63 | 151.8 | 4 | 0.815 | 85.3  | 93.7  | 87.1  | 112.6 | 94.7  | 12.5 | 6.2 | 4 | 0.540 |
| Lunasin 25 uM | 679.6 | 84.6  | 67.6  | 64.6 | 224.1 | 303.79 | 151.9 | 4 | 0.263 | 83.4  | 75.8  | 67.2  | 101.6 | 82.0  | 14.6 | 7.3 | 4 | 0.051 |
| Lunasin 50 uM | 591.6 | 78.6  | 73.6  | 49.6 | 198.4 | 262.47 | 131.2 | 4 | 0.167 | 72.6  | 70.4  | 73.2  | 78.0  | 73.6  | 3.2  | 1.6 | 4 | 0.007 |

#### leptin\_50%RAW-CM

| leptin        | pg/ml |       |       |       | mean  | SD     | SEM   | n | LSD_p value | % of control |       |       |       | mean  | SD   | SEM  | n | LSD_p value |
|---------------|-------|-------|-------|-------|-------|--------|-------|---|-------------|--------------|-------|-------|-------|-------|------|------|---|-------------|
| test          | 1     | 2     | 3     | 4     |       |        |       |   |             | 1            | 2     | 3     | 4     |       |      |      |   |             |
| control       | 232.7 | 236.0 | 301.0 | 384.3 | 288.5 | 71.21  | 35.61 | 4 |             | 100.0        | 100.0 | 100.0 | 100.0 | 100.0 | 0.0  | 0.0  | 4 |             |
| Lunasin 5 uM  | 199.3 | 241.0 | 411.0 |       | 265.6 | 98.52  | 56.88 | 3 | 0.957       | 85.7         | 102.1 | 106.9 |       | 91.2  | 16.8 | 8.4  | 3 | 0.942       |
| Lunasin 25 uM | 299.3 | 227.7 | 362.7 | 396.0 | 321.4 | 74.25  | 37.13 | 4 | 0.689       | 128.7        | 96.5  | 120.5 | 103.0 | 112.2 | 15.0 | 7.5  | 4 | 0.592       |
| Lunasin 50 uM | 261.0 | 334.3 | 444.3 | 44.3  | 271.0 | 168.85 | 84.43 | 4 | 0.831       | 112.2        | 141.7 | 147.6 | 11.5  | 103.2 | 63.1 | 31.5 | 4 | 0.886       |

#### leptin\_LPS 1000 ng/ml

| leptin        | pg/ml |       |      | mean  | SD    | SEM   | n | LSD_p value | % of control |       |       | mean  | SD   | SEM  | n | LSD_p value |
|---------------|-------|-------|------|-------|-------|-------|---|-------------|--------------|-------|-------|-------|------|------|---|-------------|
| test          | 1     | 2     | 3    |       |       |       |   |             | 1            | 2     | 3     |       |      |      |   |             |
| control       | 114.6 | 143.6 | 62.6 | 106.9 | 41.04 | 23.69 | 3 |             | 100.0        | 100.0 | 100.0 | 100.0 | 0.0  | 0.0  | 3 |             |
| Lunasin 5 uM  | 77.6  | 111.6 | 64.6 | 84.6  | 24.27 | 14.01 | 3 | 0.331       | 67.7         | 77.7  | 103.2 | 82.9  | 18.3 | 10.6 | 3 | 0.161       |
| Lunasin 25 uM | 64.6  | 75.6  | 47.6 | 62.6  | 14.11 | 8.14  | 3 | 0.072       | 56.4         | 52.6  | 76.0  | 61.7  | 12.6 | 7.3  | 3 | 0.008       |
| Lunasin 50 uM | 68.6  | 13.6  | 38.6 | 40.3  | 27.54 | 15.90 | 3 | 0.056       | 59.9         | 9.5   | 61.7  | 43.7  | 29.6 | 17.1 | 3 | 0.012       |

#### D. adiponectin

##### adiponectin\_DMED1%FBS

| adiponectin   | ng/ml |       |       |       |       | mean  | SD    | SEM | n | LSD_p value | % of control |       |       |       |       | mean  | SD   | SEM | n | LSD_p value |
|---------------|-------|-------|-------|-------|-------|-------|-------|-----|---|-------------|--------------|-------|-------|-------|-------|-------|------|-----|---|-------------|
| test          | 1     | 2     | 3     | 4     | 5     |       |       |     |   |             | 1            | 2     | 3     | 4     | 5     |       |      |     |   |             |
| control       | 537.4 | 481.2 | 400.3 | 424.1 | 659.6 | 500.5 | 103.6 | 46  | 5 |             | 100.0        | 100.0 | 100.0 | 100.0 | 100.0 | 100.0 | 0.0  | 0.0 | 5 |             |
| Lunasin 5 uM  | 347.0 | 366.0 | 305.5 |       | 664.1 | 420.6 | 164.2 | 82  | 4 | 0.402       | 64.6         | 76.1  | 76.3  |       | 100.7 | 79.4  | 15.2 | 7.6 | 4 | 0.050       |
| Lunasin 25 uM | 384.1 | 391.2 | 325.5 | 367.9 | 708.5 | 435.5 | 154.8 | 69  | 5 | 0.467       | 71.5         | 81.3  | 81.3  | 86.8  | 107.4 | 85.7  | 13.4 | 6.0 | 5 | 0.137       |
| Lunasin 50 uM |       | 398.4 | 299.3 | 476.0 | 633.5 | 451.8 | 141.1 | 71  | 4 | 0.607       |              | 82.8  | 74.8  | 112.2 | 96.0  | 91.5  | 16.4 | 8.2 | 4 | 0.393       |

##### adiponectin\_TNF-a 10 ng/ml

| adiponectin   | ng/ml |       |       |       |       | mean  | SD   | SEM | n | LSD_p value | % of control |       |       |       |       | mean  | SD   | SEM  | n | LSD_p value |
|---------------|-------|-------|-------|-------|-------|-------|------|-----|---|-------------|--------------|-------|-------|-------|-------|-------|------|------|---|-------------|
|               | 1     | 2     | 3     | 4     | 5     |       |      |     |   |             | 1            | 2     | 3     | 4     | 5     |       |      |      |   |             |
| test          |       |       |       |       |       |       |      |     |   |             |              |       |       |       |       |       |      |      |   |             |
| control       | 366.5 | 323.6 | 293.1 | 171.7 | 358.5 | 302.7 | 78.8 | 35  | 5 |             | 100.0        | 100.0 | 100.0 | 100.0 | 100.0 | 100.0 | 0.0  | 0.0  | 5 |             |
| Lunasin 5 uM  | 337.4 | 217.9 | 190.8 | 235.5 | 328.5 | 262.0 | 66.8 | 30  | 5 | 0.388       | 92.1         | 67.3  | 65.1  | 137.2 | 91.6  | 90.7  | 29.0 | 13.0 | 5 | 0.636       |
| Lunasin 25 uM | 275.5 | 299.3 | 159.3 | 171.7 | 310.2 | 243.2 | 72.2 | 32  | 5 | 0.212       | 75.2         | 92.5  | 54.4  | 100.0 | 86.5  | 81.7  | 17.8 | 8.0  | 5 | 0.357       |
| Lunasin 50 uM | 258.4 | 278.4 | 128.4 | 264.6 | 319.1 | 249.8 | 71.8 | 32  | 5 | 0.265       | 70.5         | 86.0  | 43.8  | 154.1 | 89.0  | 88.7  | 40.7 | 18.2 | 5 | 0.566       |

**adiponectin\_50%RAW-CM**

| adiponectin   | ng/ml |       |       |       |       | mean  | SD   | SEM | n | LSD_p value | % of control |       |       |       |       | mean  | SD   | SEM  | n | LSD_p value |
|---------------|-------|-------|-------|-------|-------|-------|------|-----|---|-------------|--------------|-------|-------|-------|-------|-------|------|------|---|-------------|
|               | 1     | 2     | 3     | 4     | 5     |       |      |     |   |             | 1            | 2     | 3     | 4     | 5     |       |      |      |   |             |
| test          |       |       |       |       |       |       |      |     |   |             |              |       |       |       |       |       |      |      |   |             |
| control       | 281.2 | 327.9 | 236.0 | 163.1 | 279.6 | 257.6 | 62.0 | 28  | 5 |             | 100.0        | 100.0 | 100.0 | 100.0 | 100.0 | 100.0 | 0.0  | 0.0  | 5 |             |
| Lunasin 5 uM  | 302.2 | 230.3 | 187.4 | 207.9 | 270.2 | 239.6 | 46.5 | 21  | 5 | 0.628       | 107.5        | 70.2  | 79.4  | 127.4 | 96.6  | 96.2  | 22.7 | 10.1 | 5 | 0.820       |
| Lunasin 25 uM | 272.2 | 200.3 | 160.3 | 210.8 | 308.5 | 230.4 | 59.3 | 27  | 5 | 0.466       | 96.8         | 61.1  | 67.9  | 129.2 | 110.3 | 93.1  | 28.6 | 12.8 | 5 | 0.677       |
| Lunasin 50 uM | 254.6 | 281.7 | 143.6 | 229.3 | 290.7 | 240.0 | 59.0 | 26  | 5 | 0.635       | 90.5         | 85.9  | 60.9  | 140.6 | 104.0 | 96.4  | 29.2 | 13.1 | 5 | 0.827       |

**adiponectin\_LPS 1000 ng/ml**

| adiponectin   | ng/ml |       |       |       |       | mean  | SD    | SEM | n | LSD_p value | % of control |       |       |       |       | mean  | SD   | SEM  | n | LSD_p value |
|---------------|-------|-------|-------|-------|-------|-------|-------|-----|---|-------------|--------------|-------|-------|-------|-------|-------|------|------|---|-------------|
|               | 1     | 2     | 3     | 4     | 5     |       |       |     |   |             | 1            | 2     | 3     | 4     | 5     |       |      |      |   |             |
| test          |       |       |       |       |       |       |       |     |   |             |              |       |       |       |       |       |      |      |   |             |
| control       | 381.2 | 272.7 | 365.5 | 447.0 | 532.9 | 399.9 | 97.0  | 43  | 5 |             | 100.0        | 100.0 | 100.0 | 100.0 | 100.0 | 100.0 | 0.0  | 0.0  | 5 |             |
| Lunasin 5 uM  | 378.9 | 275.0 | 366.5 | 429.8 | 597.9 | 409.6 | 119.2 | 53  | 5 | 0.897       | 99.4         | 100.9 | 100.3 | 96.2  | 112.2 | 101.8 | 6.1  | 2.7  | 5 | 0.888       |
| Lunasin 25 uM |       | 309.8 | 301.2 | 434.1 | 620.2 | 416.3 | 148.8 | 74  | 4 | 0.837       |              | 113.6 | 82.4  | 97.1  | 116.4 | 102.4 | 15.8 | 7.9  | 4 | 0.861       |
| Lunasin 50 uM | 404.1 | 438.9 | 285.0 | 543.1 | 579.6 | 450.2 | 117.2 | 52  | 5 | 0.508       | 106.0        | 161.0 | 78.0  | 121.5 | 108.8 | 115.0 | 30.2 | 13.5 | 5 | 0.248       |
